# Supplementary material
Source: publisher figshare collection journal article supplement (https://acs.figshare.com/ndownloader/files/4514998)
Supplement: Supplementary file 1 [file 4514998]

**Supporting Information for Electrochemical Oxidation of *N*-  
Nitrosodimethylamine with Boron-doped Diamond Film Electrodes**

Brian P. Chaplin, Glenn Schrader, and James Farrell  
Department of Chemical and Environmental Engineering  
University of Arizona  
Tucson, AZ 85721

*Environmental Science and Technology*

Prepared September 2, 2009

6-Pages

5-Figures

**1. Quantum Mechanics Simulations.** Transition state searches were performed using a quadratic synchronous transit (QST) method (1) and refined using an eigenvector-following method (2). The energy optimized structures and transition states were verified by frequency calculations. Imaginary frequencies with wave numbers smaller than  $10\text{ cm}^{-1}$  were considered numerical artifacts of the integration grid and convergence criteria (3).

## 2. Flow-through Reactor.

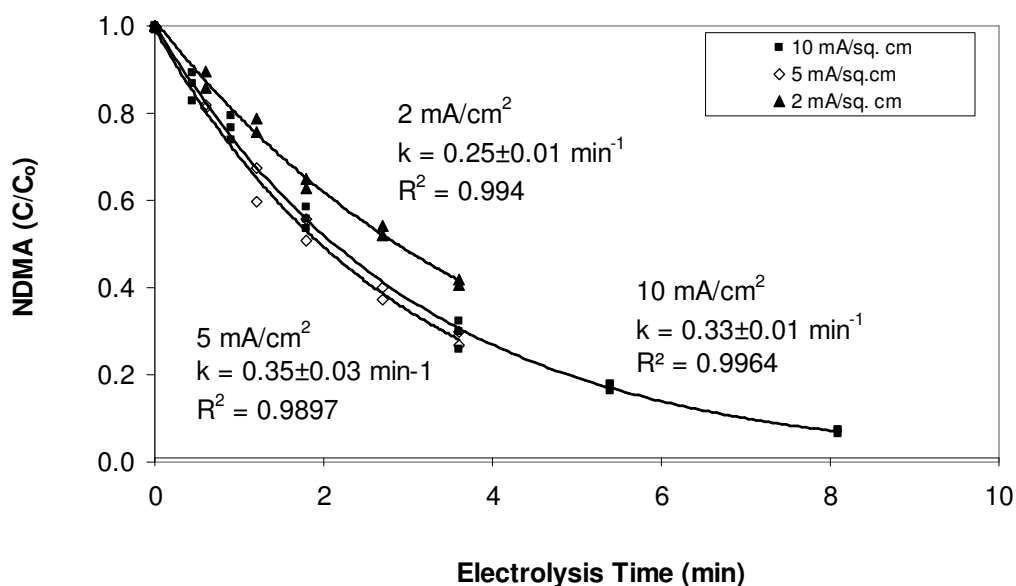

**Figure S-1.** Effect of current density on NDMA removal in the flow-through reactor. Solid lines represent regression of replicate experiments. Reported errors represent 95% confidence intervals.

### 3. Calculation of Activation Barrier for NDMA

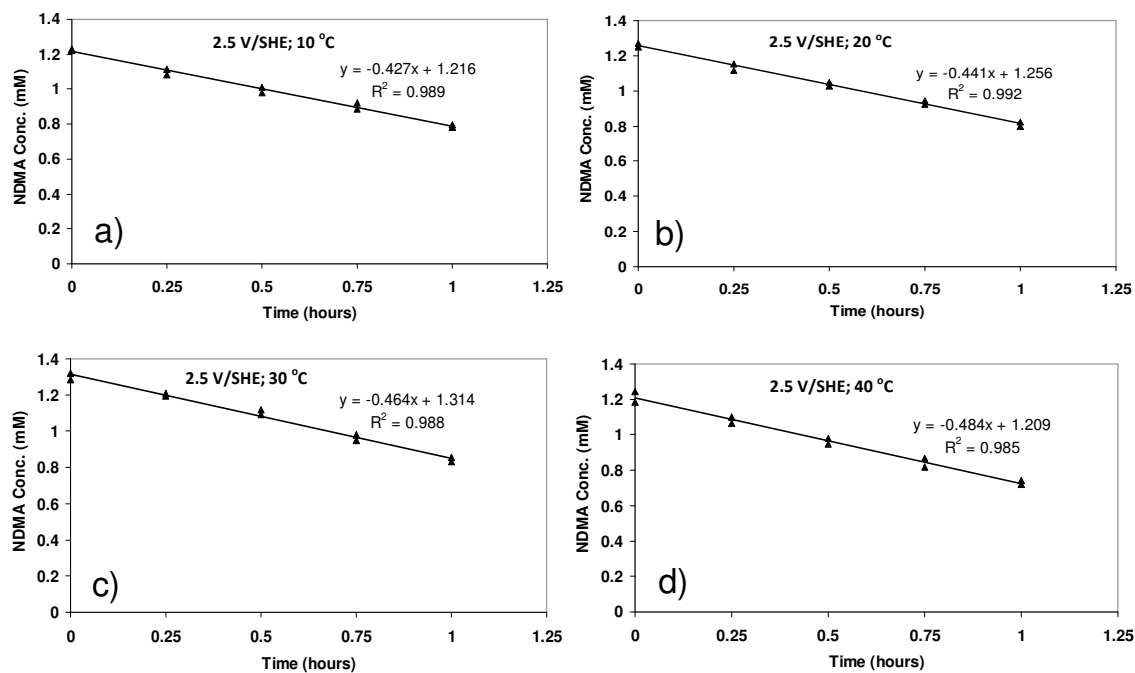

**Figure S-2.** Plot of NDMA oxidation during batch experiments at a constant potential of 2.5 V/SHE, in 50 mL of a 1 M  $\text{HClO}_4$  background electrolyte using a  $1 \text{ cm}^2$  BDD electrode, at temperatures of: a) 10 °C, b) 20 °C, c) 30 °C, and d) 40 °C. Solid lines represent linear regressions of duplicate experiments.

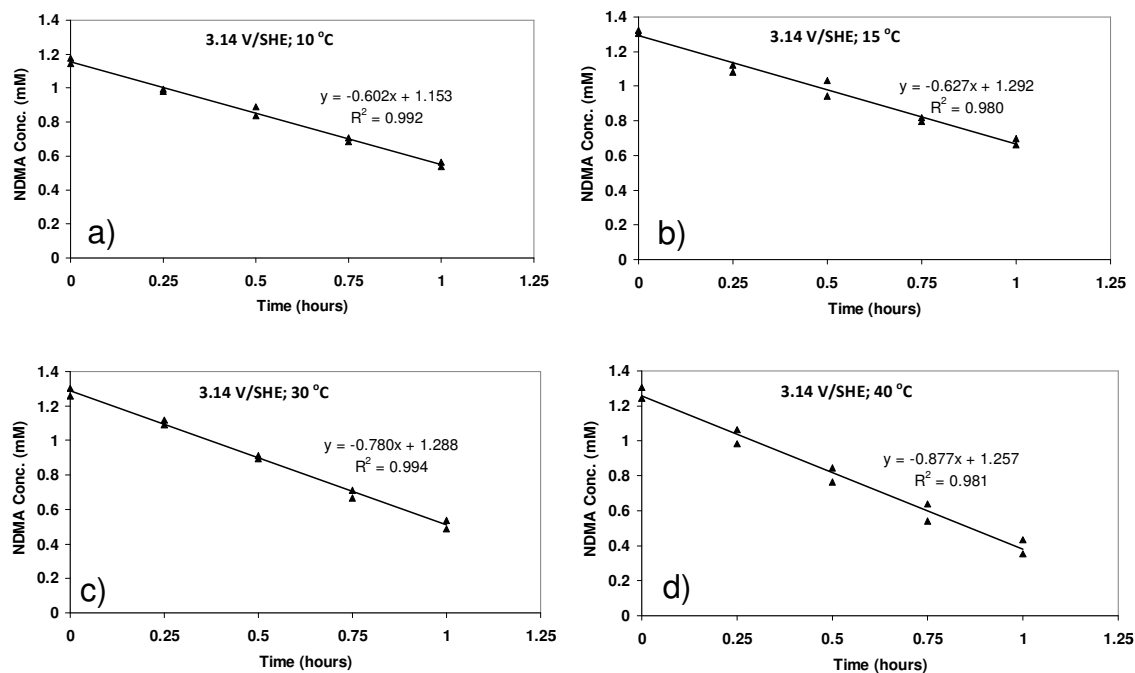

**Figure S-3.** Plot of NDMA oxidation during batch experiments at a constant potential of 3.14V/SHE, in 50 mL of a 1 M HClO<sub>4</sub> background electrolyte using a 1 cm<sup>2</sup> BDD electrode, at temperatures of: a) 10 °C, b) 15 °C, c) 30 °C, and d) 40 °C. Solid lines represent linear regressions of duplicate experiments.

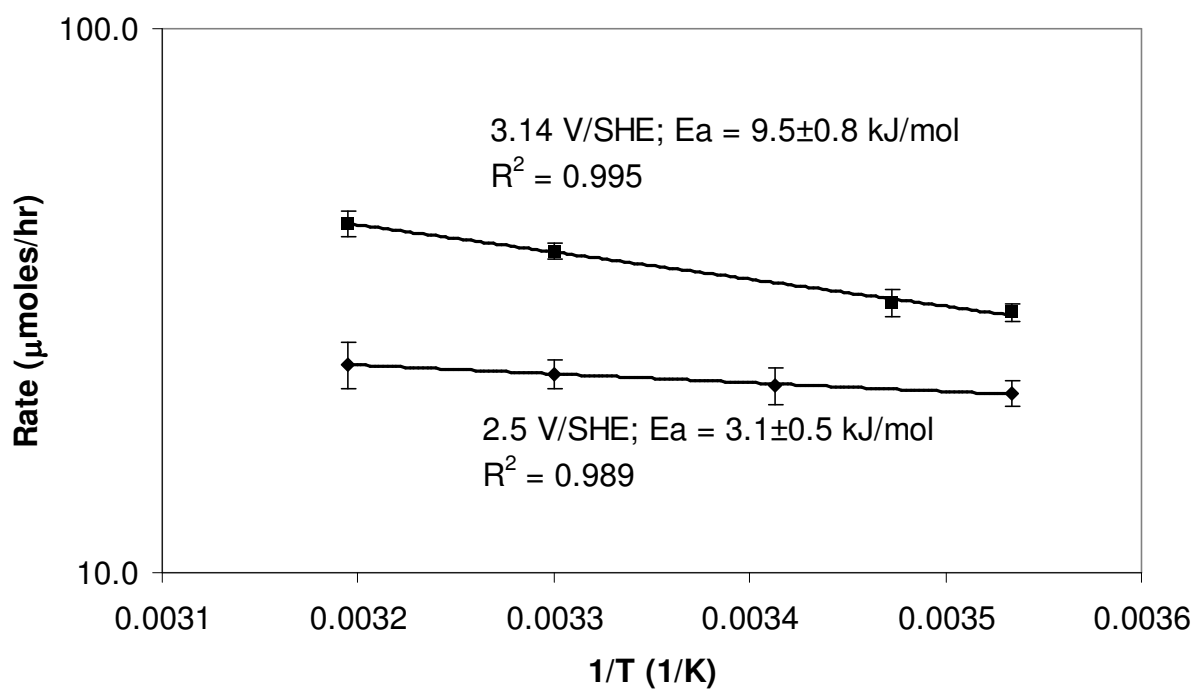

**Figure S-4.** Initial rates of NDMA oxidation versus reciprocal temperature at potentials of 2.5 and 3.14 V/SHE. Error bars represent 95% confidence intervals on rates. Confidence intervals (95%) are also shown for values determined for  $E_a$ . Solid lines represent regressions.

**4. DFT Results.** Structures from DFT calculations for NDMA, NDMA<sup>(+1)</sup>, and NDMA<sup>(+2)</sup>/H<sub>2</sub>O adduct are shown in Figure S-5 below. The water adduct stabilizes the NDMA<sup>(+2)</sup> molecule by 201 kJ, which is close to the average N-O bond strength of 230 kJ/mol. The loss of two electrons from NDMA results in shortening of the N=O and N-N bonds from 1.255 to 1.200 Å, and 1.321 to 1.261 Å, respectively. All other bond lengths remained approximately the same.

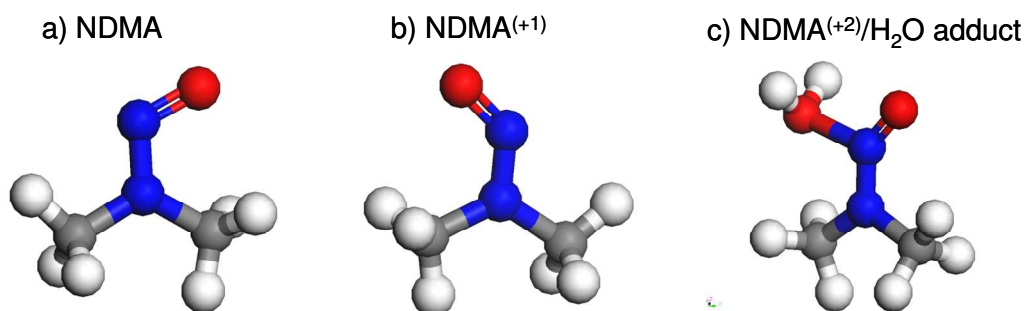

**Figure S-5.** Molecular structures for: a) NDMA, b) NDMA<sup>(+1)</sup>, and c) NDMA<sup>(+2)</sup>/H<sub>2</sub>O adduct.

Atom key: C = gray; N = blue; O = red; H = white.

## 5. References

- (1) Halgren, T. A.; Lipscomb, W. N., The synchronous-transit method for determining reaction pathways and locating molecular transition states. *Chem. Phys. Lett.* **1977**, *49*, 225-232.
- (2) Fischer, S. K., M., Conjugate peak refinement: An algorithm for finding reaction paths and accurate transition states in systems with many degrees of freedom. *Chem. Phys. Lett.* **1992**, *194*, 252-261.
- (3) Ochterski, J. W., Vibrational analysis in gaussian. Available at [www.gaussian.com/vib.htm](http://www.gaussian.com/vib.htm) (accessed June 2008).
